# Supplementary material for: Influenza Vaccination and COVID-19 Mortality in the USA: An Ecological Study
Source: MDPI journal article supplement (doi:10.3390/vaccines9050427), 2021-04-24
Supplement: s1 [file s1]

**Table S1.** The propensity of influenza vaccination based on the confounding variables. The propensity score was calculated by regressing the logit of influenza vaccination coverage on the potential confounding variables.

| Term                                         | Estimate | SD   | Statistic | p.value |
|----------------------------------------------|----------|------|-----------|---------|
| Intercept                                    | -0.83    | 1.20 | -0.69     | 0.49    |
| % families                                   | 0.52     | 0.22 | 2.37      | 0.02    |
| % families with only one parent              | 0.19     | 0.32 | 0.60      | 0.55    |
| % with bachelor degree                       | 1.19     | 0.27 | 4.37      | < 0.01  |
| % with internet                              | 0.07     | 0.15 | 0.47      | 0.64    |
| Ratio of hospital beds                       | -0.71    | 1.66 | -0.43     | 0.67    |
| % with Alzheimer dementia                    | -1.25    | 0.44 | -2.85     | < 0.01  |
| % with asthma                                | 3.22     | 0.76 | 4.25      | < 0.01  |
| % with atrial fibrillation                   | 2.14     | 0.68 | 3.17      | < 0.01  |
| % with breast cancer                         | 6.40     | 1.35 | 4.73      | < 0.01  |
| % with colorectal cancer                     | -3.59    | 1.84 | -1.95     | 0.05    |
| % with lung cancer                           | -0.59    | 2.22 | -0.27     | 0.79    |
| % with chronic obstructive pulmonary disease | -1.43    | 0.39 | -3.63     | < 0.01  |
| % with chronic kidney disease                | 1.36     | 0.26 | 5.12      | < 0.01  |
| % with depression                            | 1.79     | 0.31 | 5.82      | < 0.01  |
| % with diabetes                              | -1.60    | 0.34 | -4.71     | < 0.01  |
| % with heart failure                         | -0.80    | 0.36 | -2.24     | 0.03    |
| % with hypertension                          | 0.89     | 0.23 | 3.82      | < 0.01  |
| % with ischemic heart disease                | -0.10    | 0.23 | -0.45     | 0.65    |
| % with obesity                               | -0.31    | 0.13 | -2.31     | 0.02    |
| % with rheumatoid arthritis                  | -0.54    | 0.21 | -2.61     | 0.01    |
| % with stroke                                | 2.05     | 0.97 | 2.11      | 0.03    |
| % using tobacco                              | -1.41    | 0.38 | -3.67     | < 0.01  |
| Median income                                | 0.00     | 0.00 | 1.28      | 0.20    |
| PM <sub>2.5</sub>                            | 0.03     | 0.00 | 6.70      | < 0.01  |
| Summer temperature                           | 0.01     | 0.00 | 1.43      | 0.15    |
| Summer humidity (%)                          | 0.00     | 0.00 | 1.79      | 0.07    |
| Winter temperature (K)                       | -0.01    | 0.00 | -4.36     | < 0.01  |
| Winter humidity (%)                          | 0.00     | 0.00 | -0.72     | 0.47    |
| % age 65 and older                           | 0.66     | 0.55 | 1.20      | 0.23    |
| Median age                                   | -0.02    | 0.00 | -3.54     | < 0.01  |
| Sex ratio                                    | 0.00     | 0.00 | -3.76     | < 0.01  |
| Child dependency ratio                       | -0.01    | 0.00 | -4.59     | < 0.01  |
| % African Americans                          | -0.18    | 0.15 | -1.19     | 0.23    |
| % Latinos                                    | -0.15    | 0.10 | -1.48     | 0.14    |
| % Whites                                     | 0.34     | 0.16 | 2.06      | 0.04    |
| % Asians                                     | -1.23    | 0.41 | -3.03     | < 0.01  |
| % Native Islanders                           | 3.93     | 4.92 | 0.80      | 0.42    |
| % other race                                 | 0.25     | 0.29 | 0.87      | 0.39    |
| % two or more races                          | 0.20     | 0.52 | 0.38      | 0.70    |
| Days since the first case                    | 0.00     | 0.00 | 8.05      | < 0.01  |

SD: standard deviation.

**Table S2.** Mean distribution of COVID-19 related metrics, influenza vaccination coverage and potential confounding variables overall and in each stratum. A total of 2482 counties were included in the analysis and were divided into three equal-sized strata based on the estimated PS.

| Category              | Variable                                 | PS strata         |                   |                   |                   |
|-----------------------|------------------------------------------|-------------------|-------------------|-------------------|-------------------|
|                       |                                          | Overall           | Stratum 1         | Stratum 2         | Stratum 3         |
|                       | Number of counties                       | 2482              | 828               | 827               | 827               |
| COVID-19              | Death rate (per 100,000 people)          | 99.04 (75.04)     | 115.99 (91.13)    | 101.09 (74.63)    | 80.03 (48.73)     |
|                       | Confirmed-case rate (per 100,000 people) | 5786.21 (2474.45) | 6136.41 (2576.02) | 5920.19 (2533.65) | 5301.62 (2225.21) |
|                       | Number of days since first case          | 259.75 (22.53)    | 246.06 (31.28)    | 262.38 (12.21)    | 270.83 (8.87)     |
| Socioeconomic factors | % families                               | 0.66 (0.05)       | 0.66 (0.05)       | 0.67 (0.04)       | 0.66 (0.06)       |
|                       | % families with only 1 parent            | 0.16 (0.05)       | 0.17 (0.06)       | 0.16 (0.04)       | 0.15 (0.03)       |
|                       | % with bachelor or higher degree         | 0.14 (0.06)       | 0.11 (0.04)       | 0.13 (0.04)       | 0.19 (0.06)       |
|                       | % with internet                          | 0.74 (0.09)       | 0.67 (0.09)       | 0.73 (0.06)       | 0.80 (0.06)       |
|                       | Median income (\$1,000)                  | 51.91 (13.55)     | 43.79 (9.35)      | 50.07 (8.81)      | 61.88 (14.75)     |
| Health factors*       | % influenza vaccination coverage         | 0.43 (0.10)       | 0.35 (0.09)       | 0.44 (0.08)       | 0.52 (0.06)       |
|                       | Ratio of hospital beds                   | 3.68 (4.41)       | 4.54 (5.90)       | 3.38 (3.45)       | 3.11 (3.22)       |
|                       | % with Alzheimer's disease               | 0.10 (0.02)       | 0.10 (0.03)       | 0.10 (0.02)       | 0.10 (0.02)       |
|                       | % with asthma                            | 0.04 (0.01)       | 0.04 (0.01)       | 0.04 (0.01)       | 0.05 (0.01)       |
|                       | % with atrial fibrillation               | 0.08 (0.02)       | 0.08 (0.02)       | 0.09 (0.01)       | 0.09 (0.01)       |
|                       | % with breast cancer                     | 0.03 (0.01)       | 0.03 (0.01)       | 0.03 (0.01)       | 0.03 (0.01)       |
|                       | % with colorectal cancer                 | 0.01 (0.004)      | 0.01 (0.004)      | 0.01 (0.004)      | 0.01 (0.003)      |
|                       | % with lung cancer                       | 0.01 (0.003)      | 0.01 (0.004)      | 0.01 (0.003)      | 0.01 (0.003)      |
|                       | % with obstructive pulmonary disease     | 0.13 (0.03)       | 0.13 (0.04)       | 0.13 (0.03)       | 0.11 (0.03)       |
|                       | % with chronic kidney disease            |                   |                   |                   |                   |
|                       | % with depression                        | 0.24 (0.05)       | 0.24 (0.05)       | 0.25 (0.05)       | 0.25 (0.04)       |
|                       | % with diabetes                          | 0.19 (0.03)       | 0.17 (0.04)       | 0.19 (0.03)       | 0.20 (0.03)       |
|                       | % with heart failure                     | 0.27 (0.05)       | 0.28 (0.06)       | 0.27 (0.05)       | 0.26 (0.04)       |
|                       | % with hypertension                      | 0.15 (0.03)       | 0.16 (0.04)       | 0.15 (0.03)       | 0.14 (0.02)       |
|                       | % with ischemic heart disease            | 0.58 (0.08)       | 0.57 (0.10)       | 0.58 (0.08)       | 0.57 (0.07)       |
|                       | % with obesity                           | 0.27 (0.05)       | 0.28 (0.06)       | 0.28 (0.05)       | 0.26 (0.04)       |
|                       | % with obesity                           | 0.21 (0.07)       | 0.20 (0.07)       | 0.22 (0.07)       | 0.22 (0.06)       |
|                       | % with rheumatoid arthritis              | 0.34 (0.05)       | 0.34 (0.06)       | 0.34 (0.05)       | 0.34 (0.04)       |
|                       | % stroke or transient ischemic attack    | 0.03 (0.01)       | 0.03 (0.01)       | 0.03 (0.01)       | 0.04 (0.01)       |
|                       | % using tobacco                          | 0.11 (0.03)       | 0.12 (0.04)       | 0.12 (0.03)       | 0.10 (0.03)       |
| Environmental factors | Average PM2.5 (microg/m3)                | 8.51 (2.50)       | 7.27 (2.55)       | 8.58 (2.25)       | 9.68 (2.08)       |
|                       | Winter temperature (K)                   | 280.35 (6.69)     | 282.04 (6.61)     | 280.04 (6.82)     | 278.96 (6.26)     |
|                       | Winter humidity (%)                      | 87.54 (4.89)      | 87.27 (5.00)      | 88.25 (4.78)      | 87.10 (4.81)      |
|                       | Summer temperature (K)                   | 303.09 (3.20)     | 304.01 (3.39)     | 303.03 (3.23)     | 302.25 (2.71)     |
|                       | % summer humidity                        | 89.02 (9.35)      | 86.85 (11.33)     | 90.06 (8.92)      | 90.16 (6.87)      |
|                       | Median age                               | 40.80 (5.13)      | 41.68 (5.58)      | 41.17 (4.59)      | 39.53 (4.93)      |

|                                |                           |               |                |               |               |
|--------------------------------|---------------------------|---------------|----------------|---------------|---------------|
| <b>Population demographics</b> | % 65 years or more of age | 0.18 (0.04)   | 0.19 (0.05)    | 0.18 (0.04)   | 0.17 (0.04)   |
|                                | Sex ratio                 | 99.96 (9.71)  | 103.11 (14.01) | 99.38 (7.13)  | 97.39 (4.39)  |
|                                | Child dependency ratio    | 37.97 (6.23)  | 39.90 (7.33)   | 38.10 (5.05)  | 35.92 (5.42)  |
|                                |                           |               |                |               |               |
| <b>Race</b>                    | % African Americans       | 0.09 (0.14)   | 0.12 (0.19)    | 0.08 (0.13)   | 0.08 (0.10)   |
|                                | % Latinos                 | 0.10 (0.14)   | 0.13 (0.18)    | 0.08 (0.12)   | 0.08 (0.08)   |
|                                | % Whites                  | 0.83 (0.16)   | 0.80 (0.20)    | 0.85 (0.14)   | 0.84 (0.12)   |
|                                | % Asians                  | 0.02 (0.03)   | 0.01 (0.01)    | 0.01 (0.03)   | 0.03 (0.03)   |
|                                | % Native Islanders        | 0.001 (0.002) | 0.001 (0.001)  | 0.001 (0.002) | 0.001 (0.001) |
|                                | % other race              | 0.02 (0.04)   | 0.03 (0.05)    | 0.02 (0.04)   | 0.02 (0.03)   |
|                                | % two more races          | 0.02 (0.02)   | 0.02 (0.02)    | 0.02 (0.02)   | 0.03 (0.01)   |

\*Health factors refers to those  $\geq 65$  years old only. Standard deviations are in parenthesis.

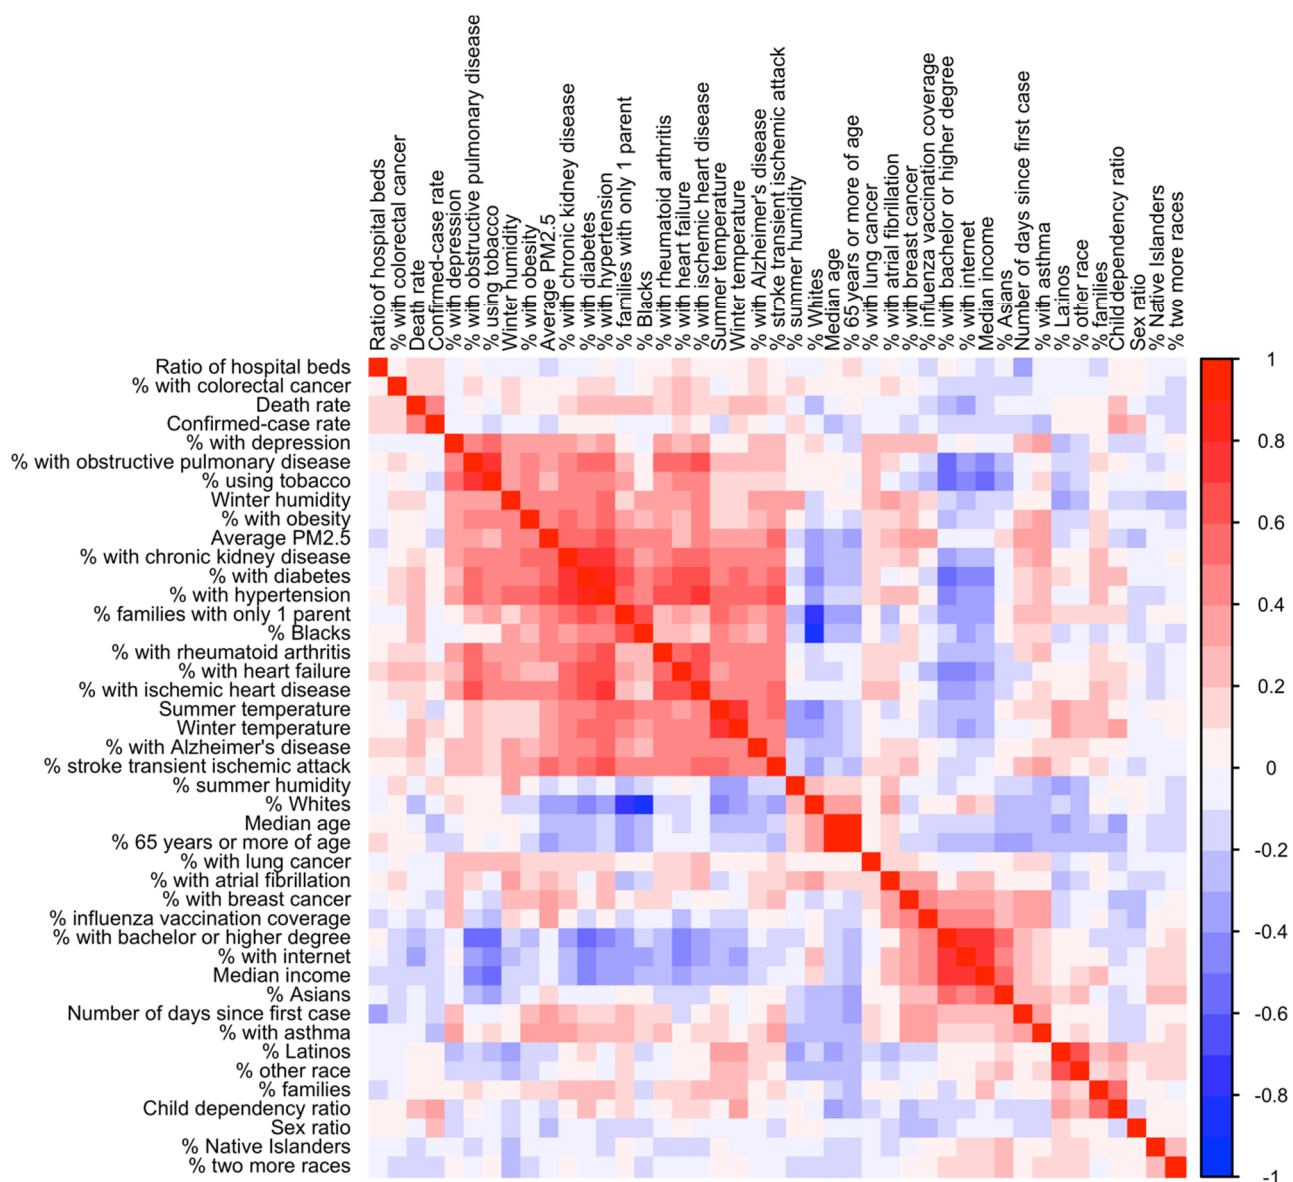

**Figure S1.** Correlation matrix of the potential confounders, mortality and case rates. Highly correlated variables are clustered together.
